# Supplementary material for: Synthesis and catalytic activity of amino-functionalized SBA-15 materials with controllable channel lengths and amino loadings
Source: Royal Society of Chemistry journal article supplement (doi:10.1039/c2jm14393c), 2011-12-16
Supplement: c2jm14393c.pdf [file c2jm14393c.pdf]

## **Supporting Information**

### **Synthesis and Catalytic Activity of Amino-functionalized SBA-15 Materials with Controllable Channel Lengths and Amino Loadings**

Shih-Yuan Chen,<sup>1</sup> Ching-Ya Huang,<sup>1</sup> Toshiyuki Yokoi,<sup>2</sup> Chih-Yuan Tang,<sup>3</sup>  
Shing-Jong Huang,<sup>1</sup> Jey-Jau Lee,<sup>4</sup> Jerry C. C. Chan,<sup>1</sup> Takashi Tatsumi,<sup>2</sup> and Soofin  
Cheng<sup>1\*</sup>

<sup>1</sup>*Department of Chemistry, National Taiwan University, Taipei 106, Taiwan.*

<sup>2</sup>*Catalytic Chemistry Division, Chemical Resources Laboratory, Tokyo Institute of  
Technology, 4259-R1-9 Nagatsuta, Midori-ku, Yokohama 226-8503, Japan.*

<sup>3</sup>*Instrutmentation Center, National Taiwan University, Taipei 106, Taiwan.*

<sup>4</sup>*Research Division, National Synchrotron Radiation Research Center, Hsinchu 300,  
Taiwan.*

To whom the correspondence should be address:

Prof. Soofin Cheng

Department of Chemistry, National Taiwan University, Taipei 106, Taiwan.

TEL: +886-2-33661662

FAX: +886-2-2363-6359

E-mail: [chem1031@ntu.edu.tw](mailto:chem1031@ntu.edu.tw)

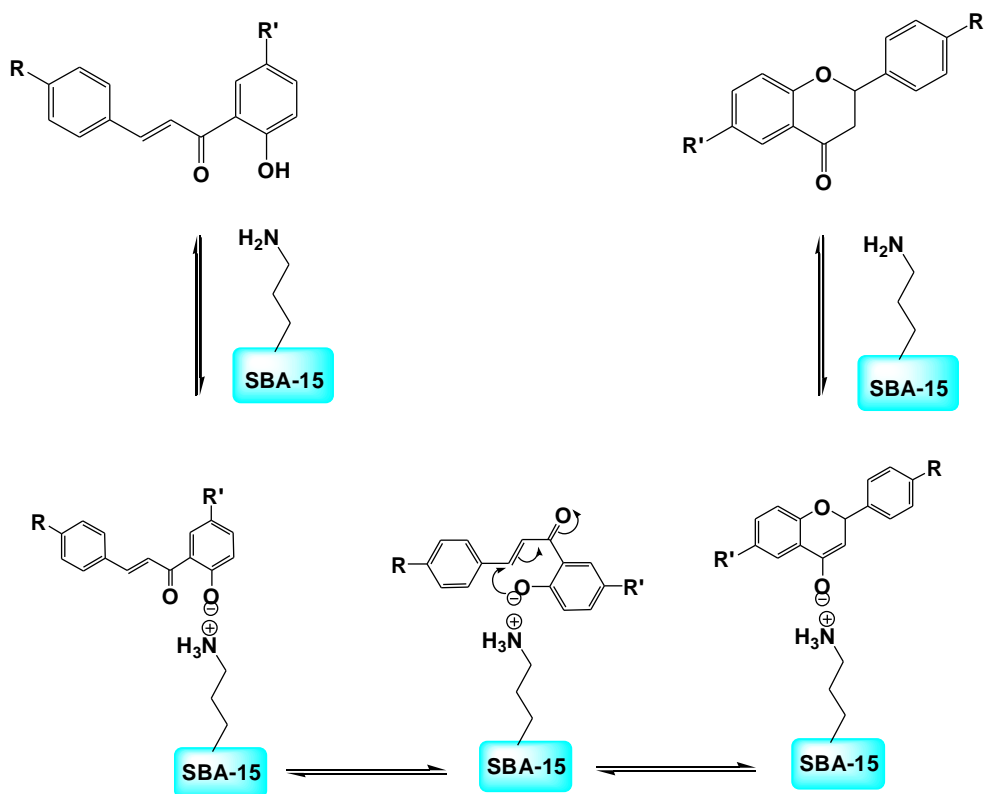

**Scheme S1.** Possible mechanism for intramolecular Michael Addition of 2'-hydroxychalcone to flavanone over amino-functionalized SBA-15 mesoporous materials.

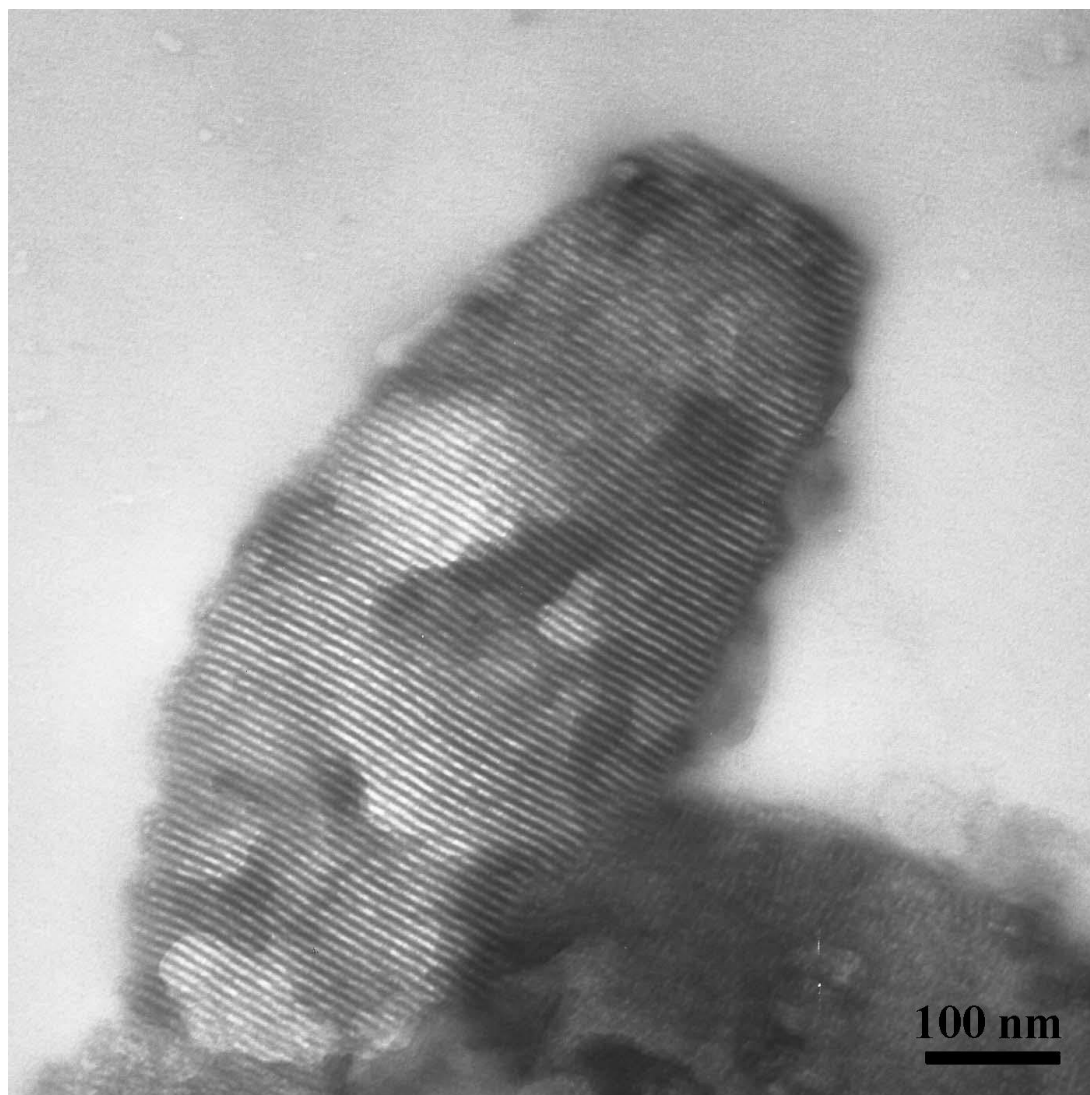

**Fig. S1.** TEM photos of platelet 10NH<sub>2</sub>-SBA-15 material, where the NaCl/TEOS and Zr/TEOS molar ratios are 2 and 0.05, respectively.

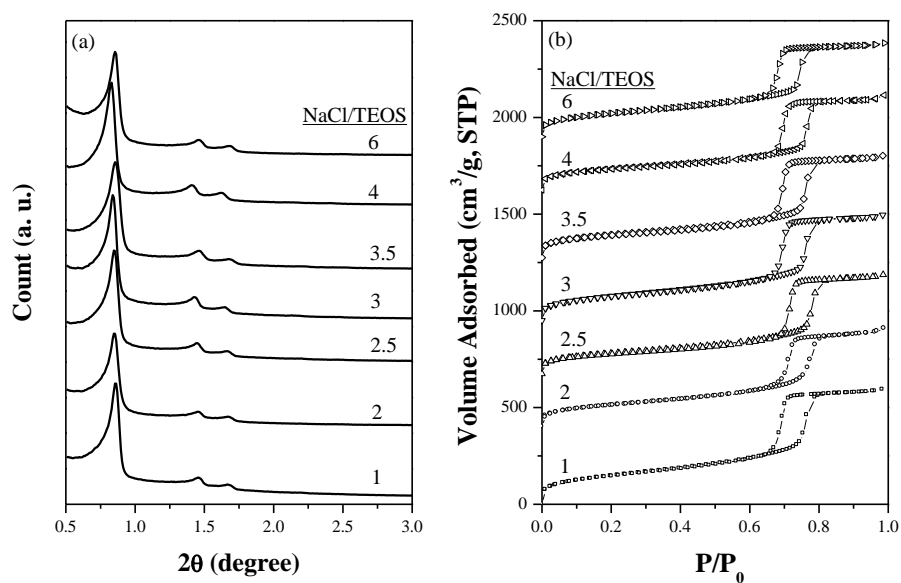

**Fig. S2.** (a) Small-angle XRD patterns and (b)  $N_2$  adsorption-desorption isotherms of TMAOH-treated  $10NH_2$ -SBA-15 materials, where the Zr/TEOS molar ratio is kept in 0.05, and the NaCl/TEOS molar ratios are varied in 1-6.

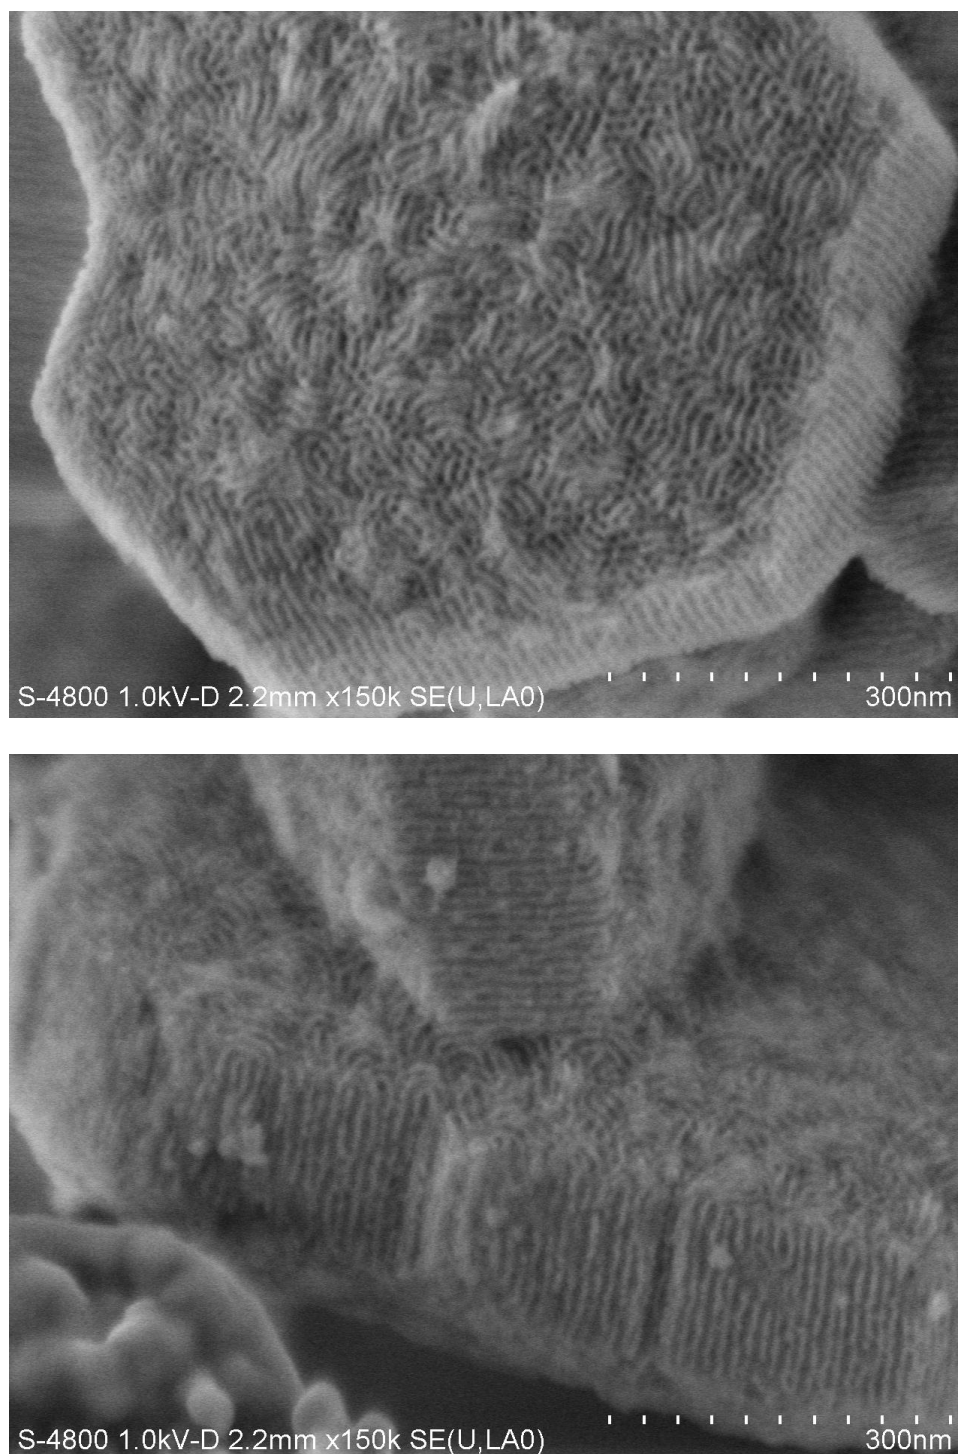

**Fig. S3.** HRSEM photos of TMAOH-treated platelet 10NH<sub>2</sub>-SBA-15 material, where the NaCl/TEOS and Zr/TEOS molar ratios are 2 and 0.05, respectively.



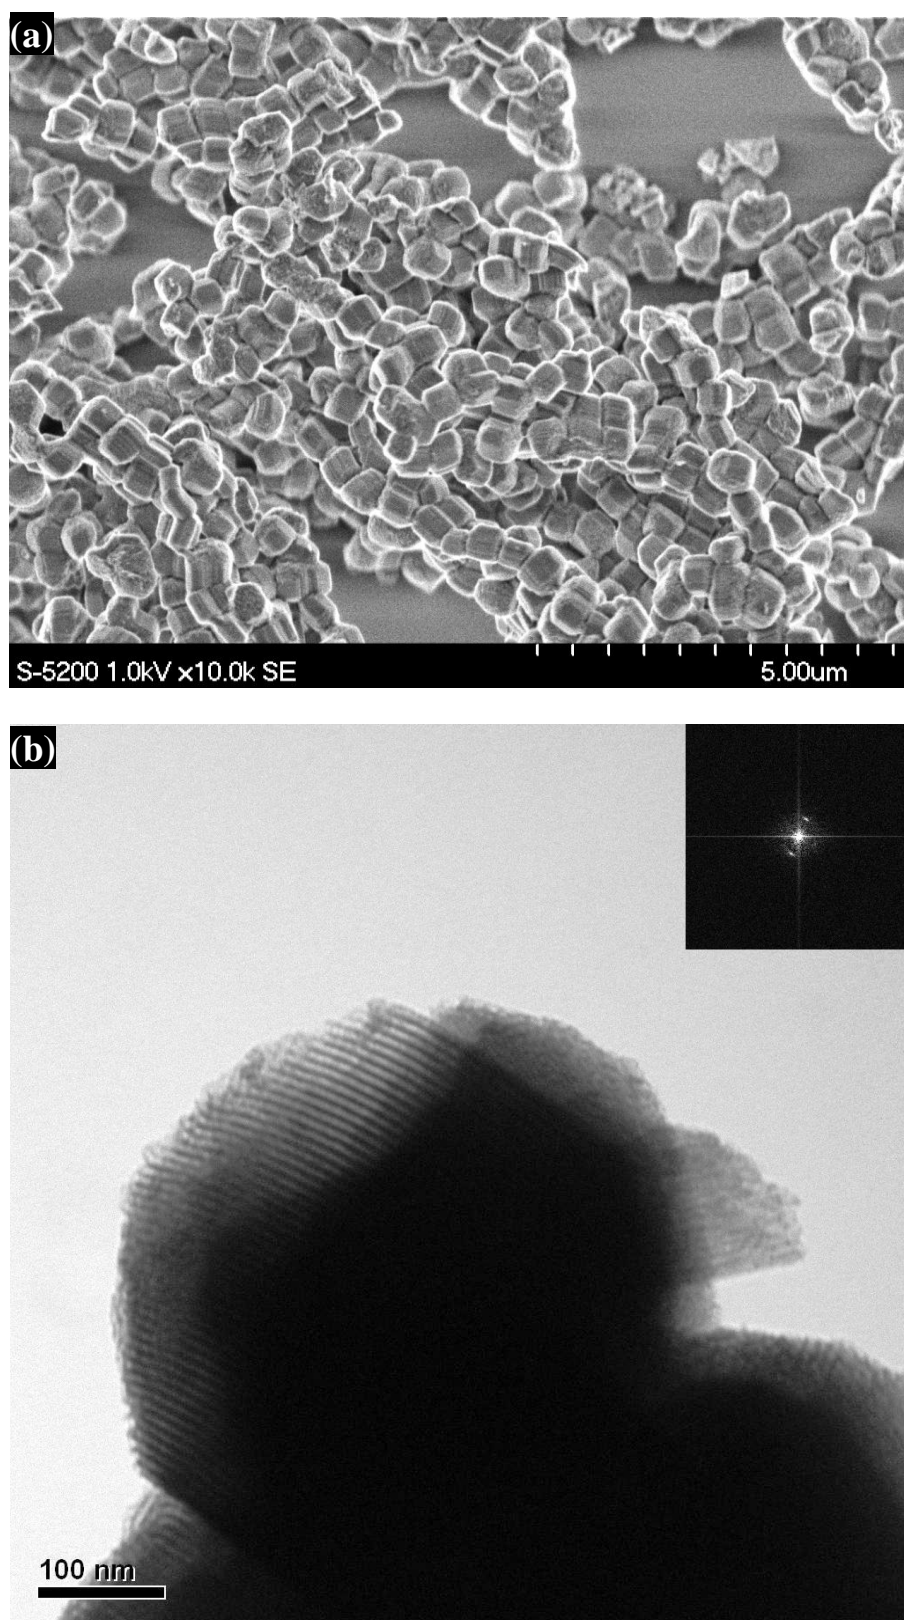

**Fig. S4.** SEM and TEM photos of TMAOH-treated rod-like 10NH<sub>2</sub>-SBA-15 material, where the NaCl/TEOS and Zr/TEOS molar ratios are 3.5 and 0.05, respectively.

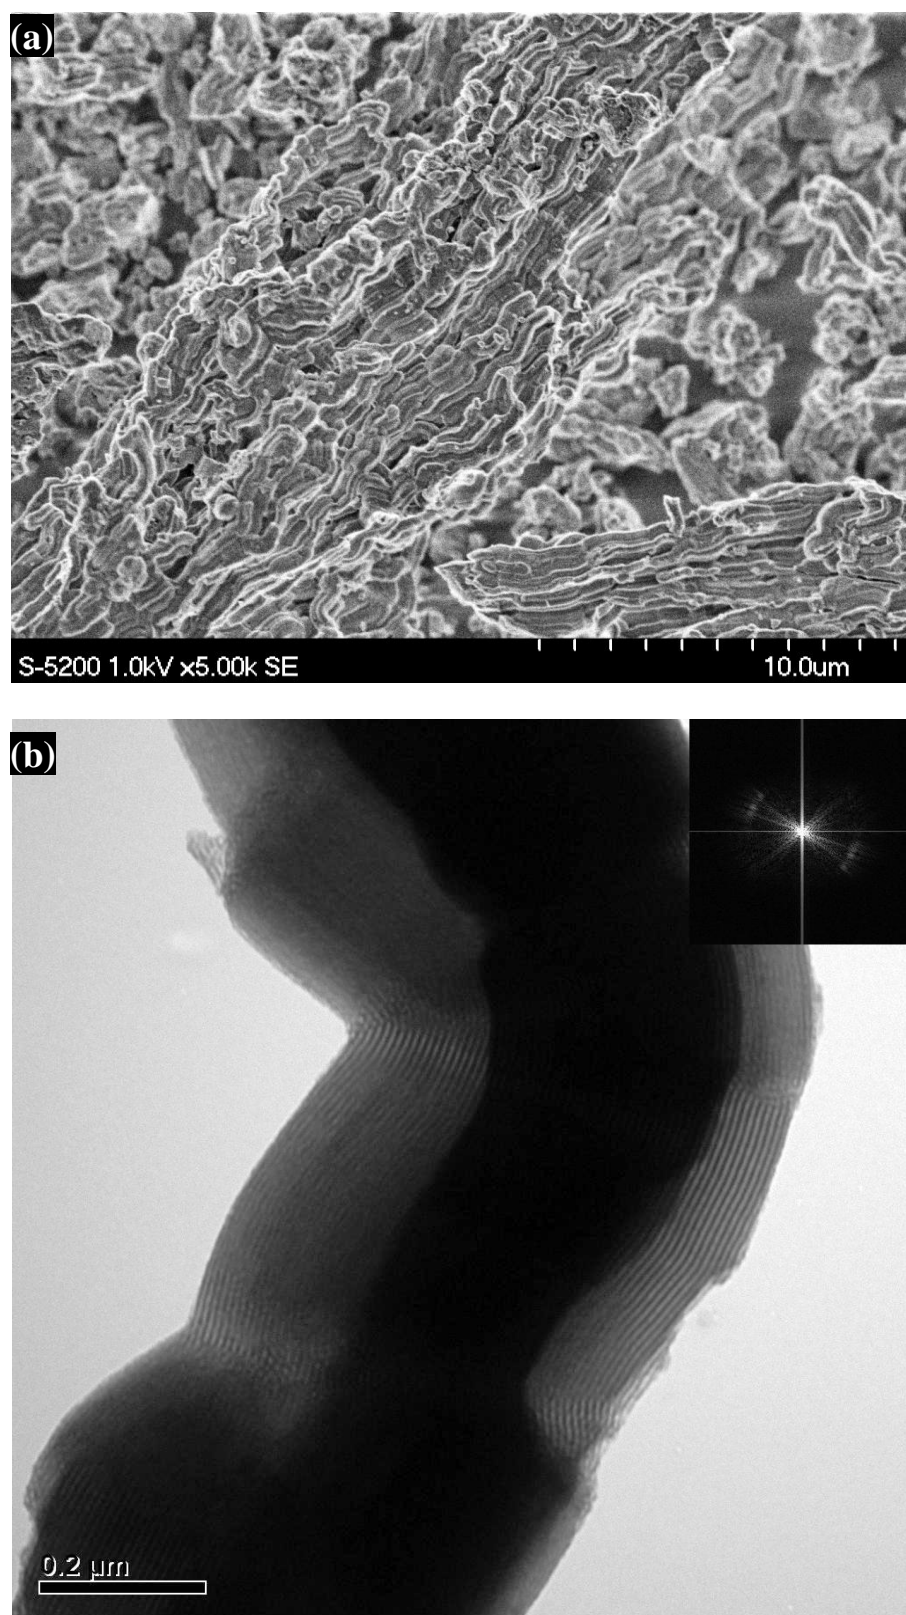

**Fig. S5.** SEM and TEM photos of TMAOH-treated fiber-like 10NH<sub>2</sub>-SBA-15 material, where the NaCl/TEOS and Zr/TEOS molar ratios are 6 and 0.05, respectively.



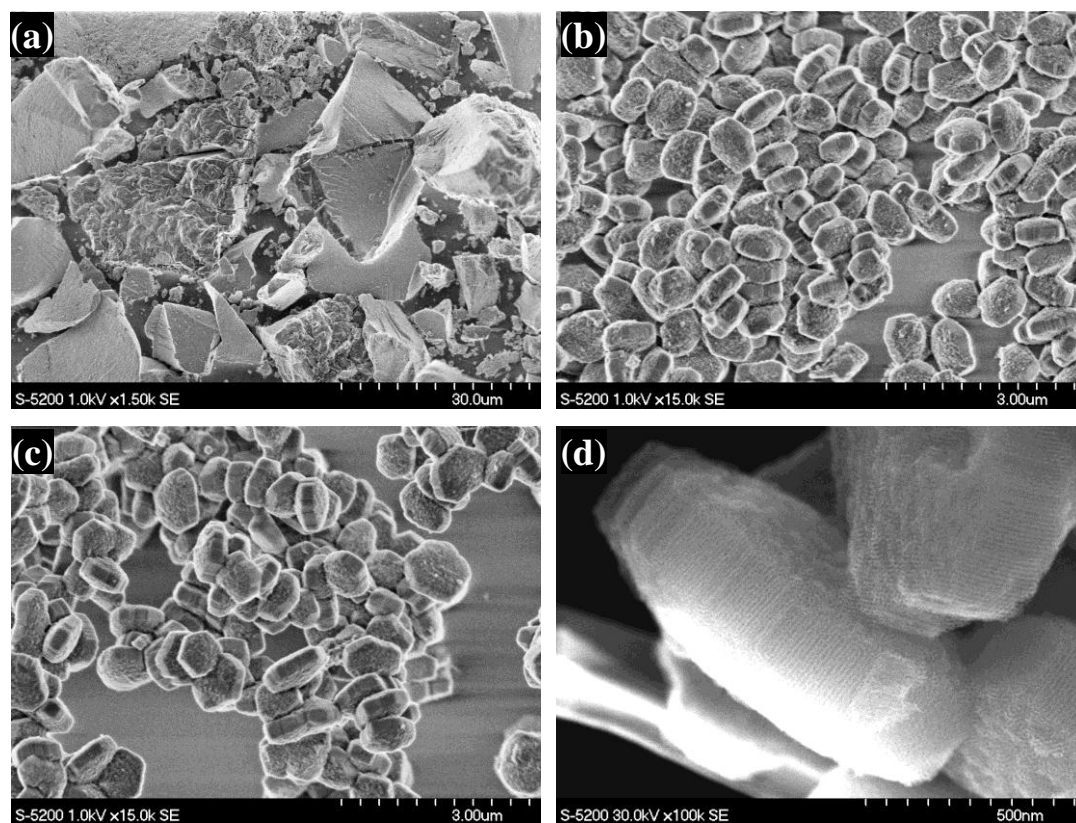

**Fig. S6.** SEM photos of 10NH<sub>2</sub>-SBA-15 materials prepared with no TEOS prehydrolysis (a) and various TEOS prehydrolysis periods of (b) 0.5, (c) 1, and (d) 2, where the NaCl/TEOS and Zr/TEOS molar ratios are 6 and 0.05, respectively.



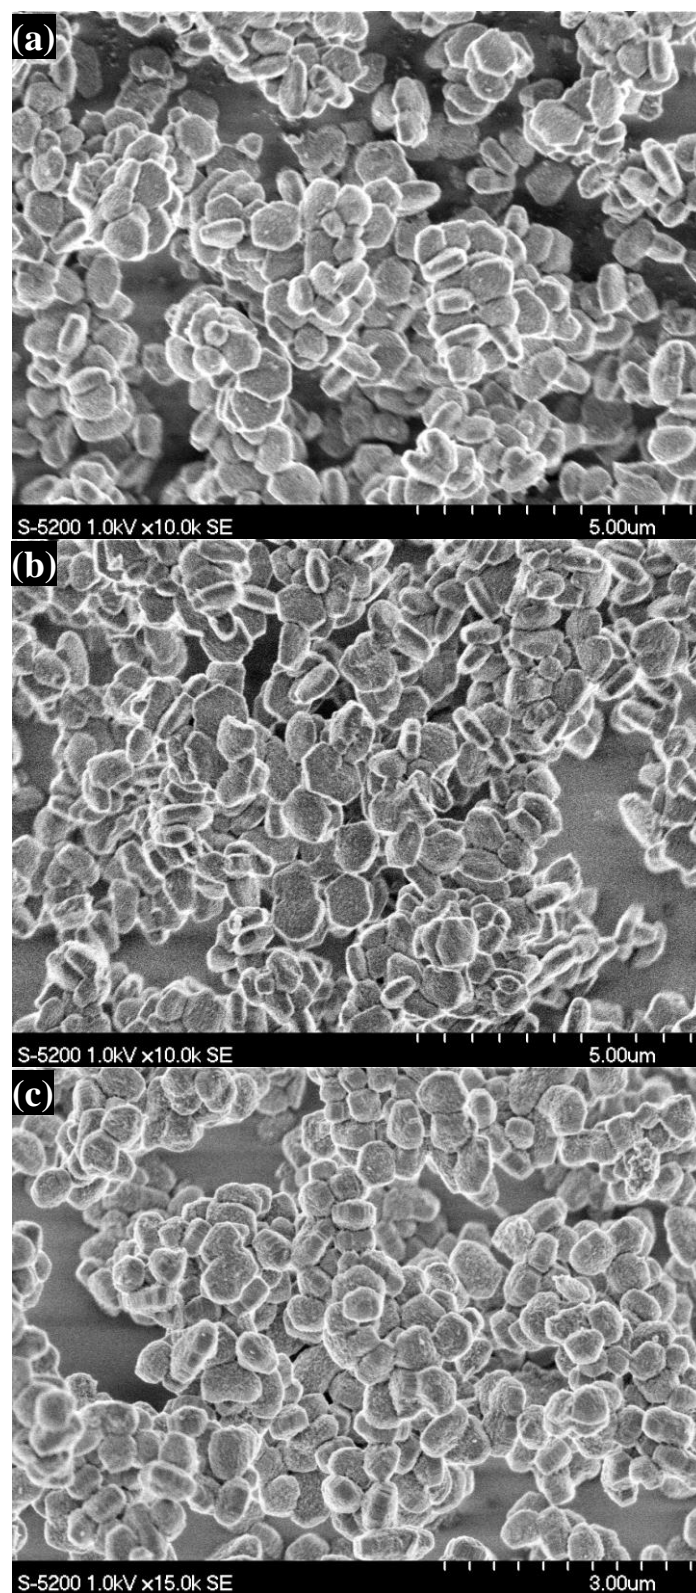

**Fig. S7.** SEM photos of platelet materials: (a) 5NH<sub>2</sub>-SBA-15, (b) 20NH<sub>2</sub>-SBA-15, and (c) 30NH<sub>2</sub>-SBA-15.

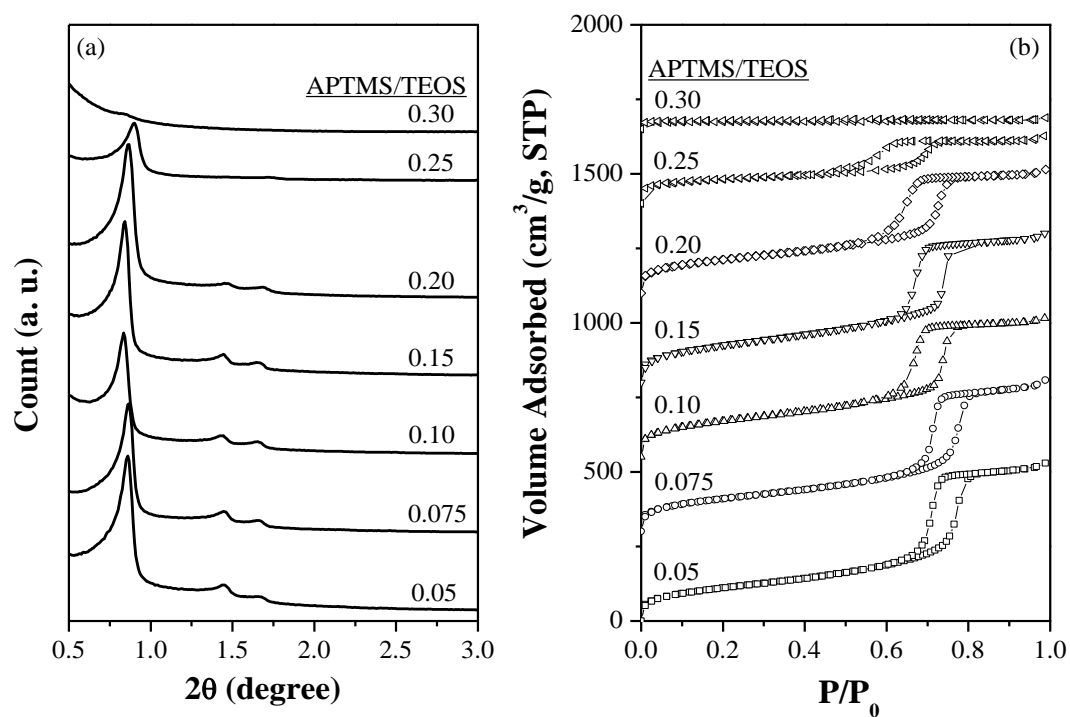

**Fig. S8.** (a) Small-angle XRD patterns and (b)  $\text{N}_2$  adsorption-desorption isotherms of TMAOH-treated platelet  $\text{NH}_2$ -SBA-15 materials various APTMS/TEOS molar ratios.

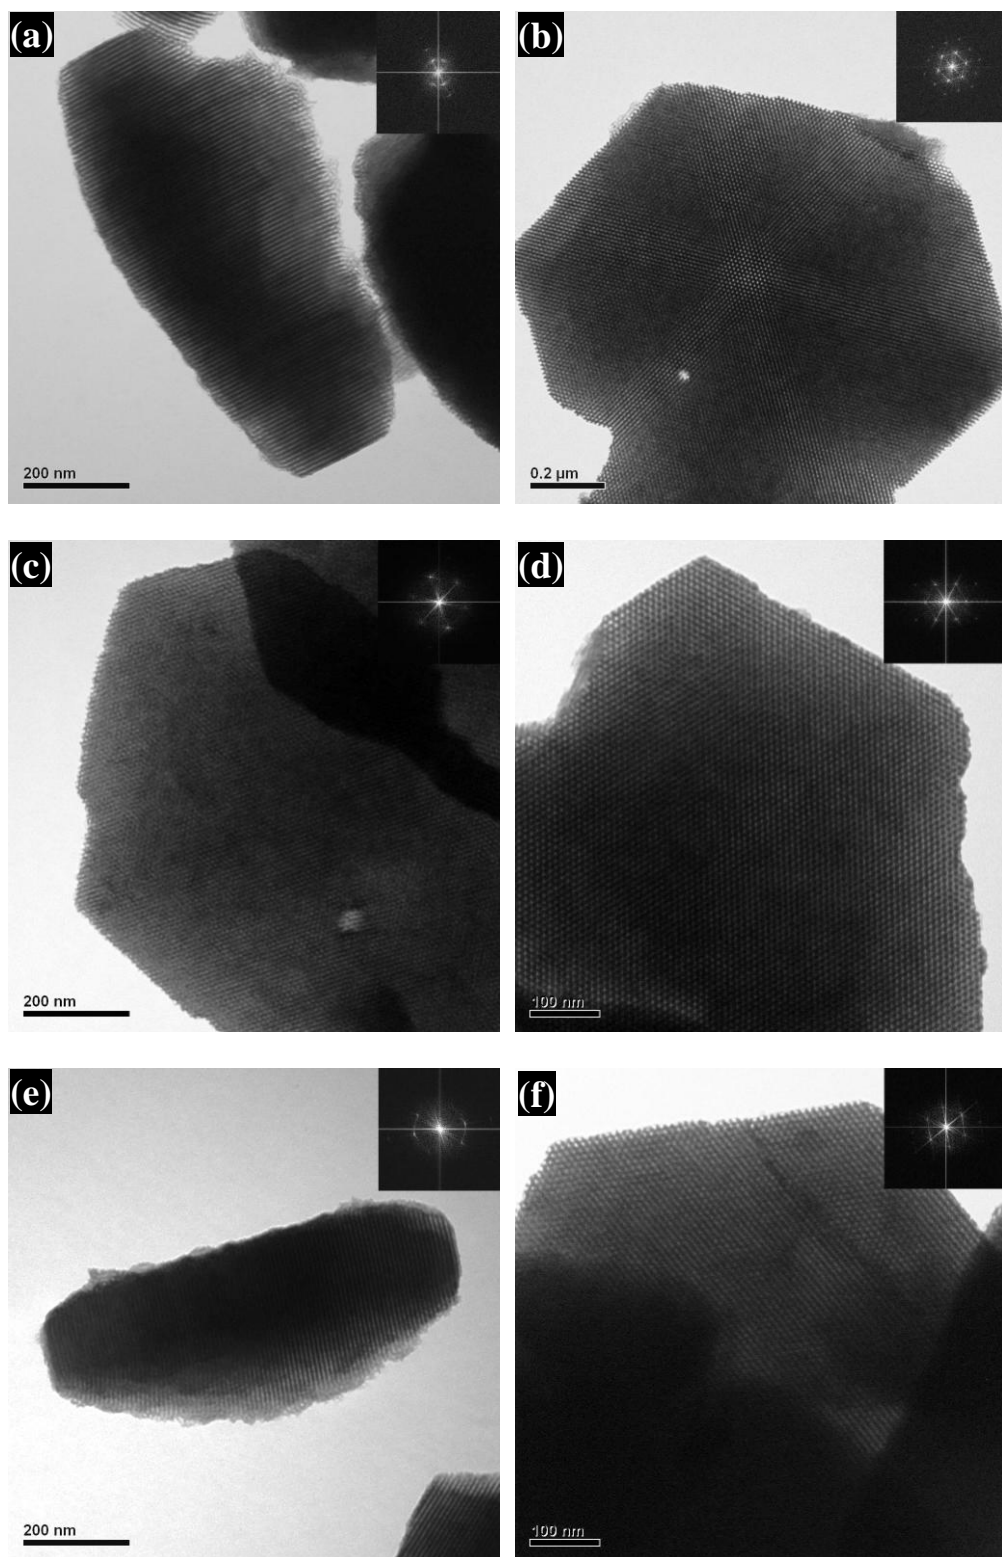

**Fig. S9.** TEM photos of TMAOH-treated platelet  $\text{NH}_2\text{-SBA-15}$  materials prepared with APTMS/TEOS molar ratios of (a,b) 5, (c) 10, (d) 20, and (e) 25, where the NaCl/TEOS molar ratio is kept in 2.

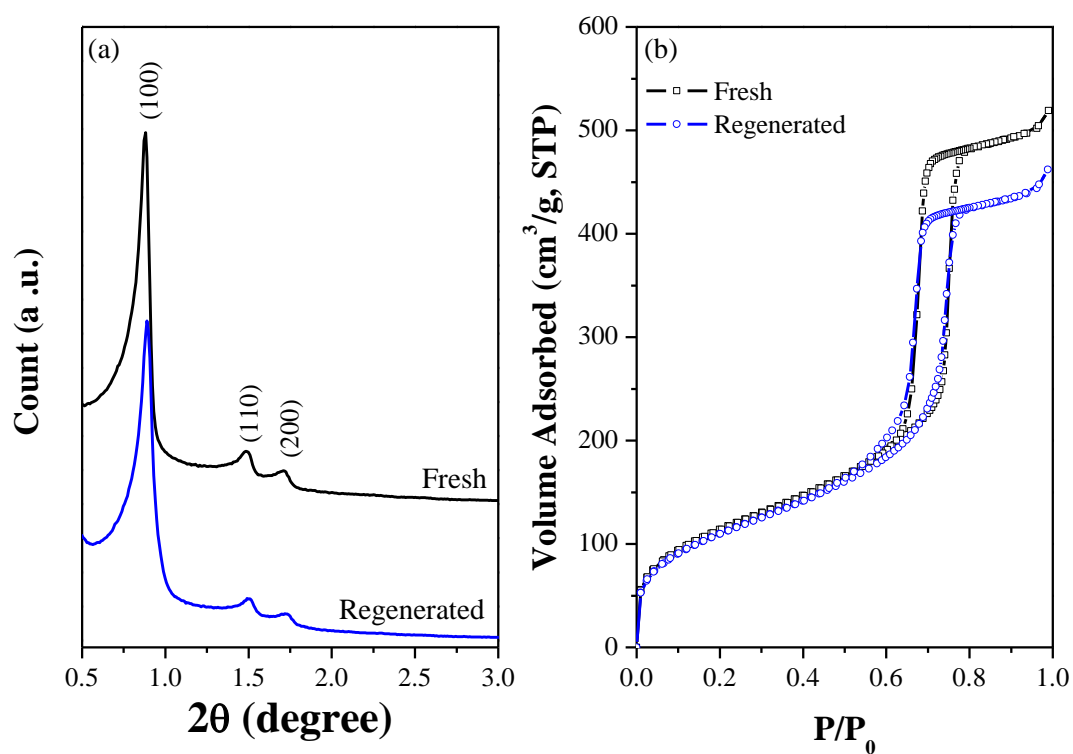

**Fig. S10.** Small-angle XRD pattern and N<sub>2</sub> adsorption-desorption isotherms isotherm of fresh and regenerated platelet 10NH<sub>2</sub>-SBA-15 materials.



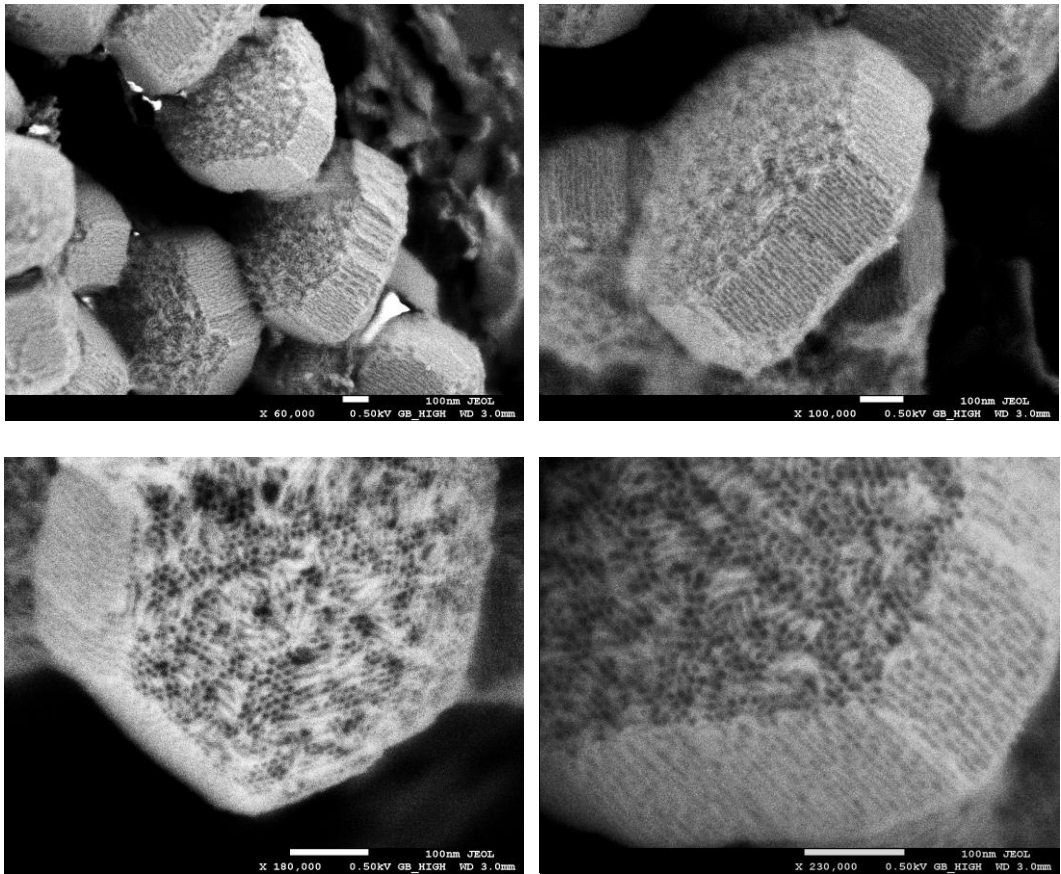

**Fig. S11.** HRSEM photos of regenerated platelet 10NH<sub>2</sub>-SBA-15 material.

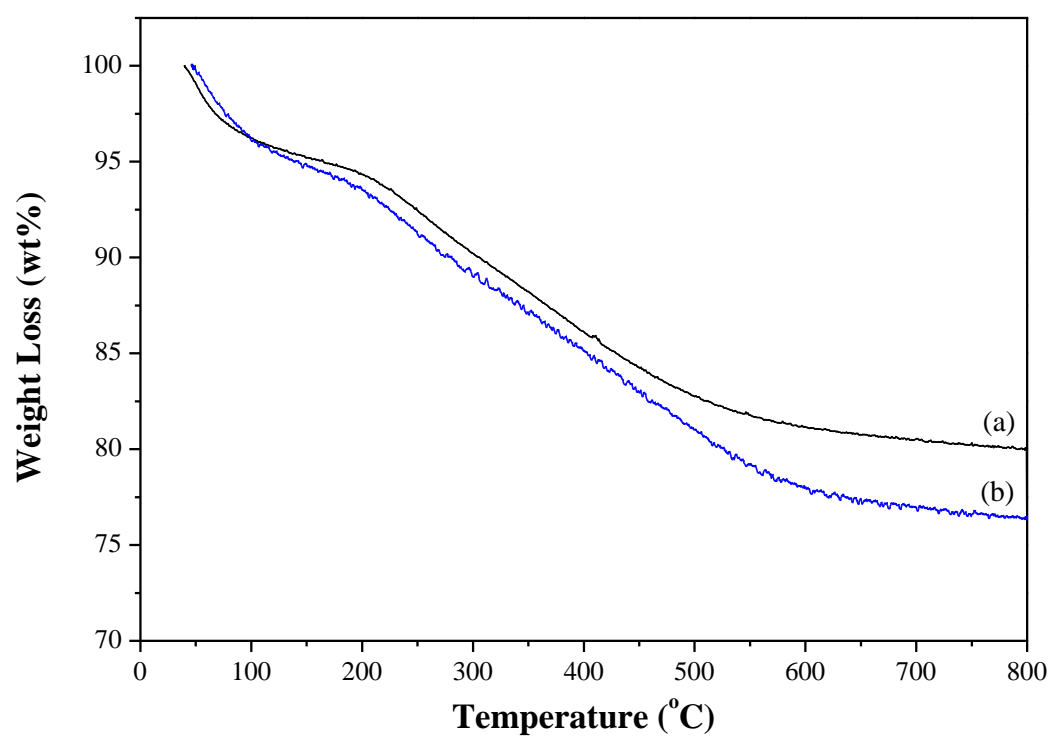

**Fig. S12.** TGA profiles of (a) fresh and (b) regenerated catalysts of platelet 10NH<sub>2</sub>-SBA-15 materials.
